# Supplementary material for: Predicting social media users’ indirect aggression through pre-trained models
Source: PeerJ journal article supplement (doi:10.7717/peerj-cs.2292), 2024-09-02
Supplement: Appendix_A.pdf [file Appendix_A.pdf]

## Appendix A. Summary of direct aggression detection studies

| Author                    | Method                                                          | Dataset                                                                        | Aims                                               | Context             | Feature                                                                                                                 |
|---------------------------|-----------------------------------------------------------------|--------------------------------------------------------------------------------|----------------------------------------------------|---------------------|-------------------------------------------------------------------------------------------------------------------------|
| Mazari et al., 2024       | BERT + MLP                                                      | 223 thousand comments from Wikipedia                                           | Hate speech detection                              | Social media        | Textual comments with categories' labels                                                                                |
| Jaafar and Lachiri, 2023  | MLP                                                             | An audiovisual dataset with a set of 21 videos                                 | Aggression detection                               | Surveillance videos | Acoustic, visual, text, and extra-information                                                                           |
| Alotaibi et al., 2021     | CNN, BiRNN, and a transformer block                             | 55 thousand tweets in Twitter                                                  | Comments' classification                           | Twitter             | Textual comments with Tokenization                                                                                      |
| Sadiq et al., 2021        | MLP                                                             | 20,001 tweets with aggressive annotation                                       | Aggression detection                               | Twitter             | Textual tweets with Word Embedding                                                                                      |
| Balakrishnan et al., 2019 | Random Forest                                                   | 9 thousand tweets with labels                                                  | Cyberbullying classification                       | Twitter             | Number of mentions, number of followers and following, popularity, favorite count, status count and number of hash tags |
| Risch and Krestel, 2018   | MLP                                                             | 15 thousand posts                                                              | Harmful posts' identification                      | Facebook            | Textual posts with Word Embedding, Character N-grams, Word N-grams and Syntactic features                               |
| Chatzakou et al., 2017    | Naive Bayes, Decision trees, Random Forest, and neural networks | 1 million random tweets and 650 thousand tweets with 309 hate related hashtags | Detection of Cyberbullying and aggressive behavior | Twitter             | Text, user information, and network                                                                                     |
| Al-Garadi et al., 2016    | Naive Bayes, Random Forest, and KNN                             | 2.5 million geo-tagged tweets                                                  | Cyberbullying detection                            | Twitter             | Network, activity, user information, and content                                                                        |
| Van Hee et al., 2015      | Support Vector Machines                                         | 85 thousand Dutch posts                                                        | Cyberbullying classification                       | Ask.fm              | Textual posts with bag-of-words features and sentiment lexicon features                                                 |

## REFERENCES

- Mazari, A. C., Boudoukhani, N., and Djeflal, A. (2024). BERT-based ensemble learning for multi-aspect hate speech detection. *Cluster Computing*, 27(1): 325-339.
- Jaafar, N., and Lachiri, Z. (2023). Multimodal fusion methods with deep neural networks and meta-information for aggression detection in surveillance. *Expert Systems with Applications*, 211: 118523.
- Alotaibi, M., Alotaibi, B., and Razaque, A. (2021). A multichannel deep learning framework for cyberbullying detection on social media. *Electronics*, 10(21): 2664.
- Sadiq, S., Mehmood, A., Ullah, S., Ahmad, M., Choi, G. S., and On, B. W. (2021). Aggression detection through deep neural model on twitter. *Future Generation Computer Systems*, 114: 120-129.
- Balakrishnan, V., Khan, S., Fernandez, T., & Arabnia, H. R. (2019). Cyberbullying detection on twitter using Big Five and Dark Triad features. *Personality and individual differences*, 141: 252-257.
- Risch, J., and Krestel, R. (2018). Aggression identification using deep learning and data augmentation. *In Proceedings of the first workshop on trolling, aggression and cyberbullying*, pp. 150-158.
- Chatzakou, D., Kourtellis, N., Blackburn, J., De Cristofaro, E., Stringhini, G., and Vakali, A. (2017). Mean birds: Detecting aggression and bullying on twitter. *In Proceedings of the 2017 ACM on web science conference*, pp. 13-22.
- Al-Garadi, M. A., Varathan, K. D., and Ravana, S. D. (2016). Cybercrime detection in online communications: The experimental case of cyberbullying detection in the Twitter network. *Computers in Human Behavior*, 63: 433-443.
- Van Hee, C., Lefever, E., Verhoeven, B., Mennes, J., Desmet, B., De Pauw, G., ... and Hoste, V. (2015). Detection and fine-grained classification of cyberbullying events. *In Proceedings of the international conference recent advances in natural language processing*, pp. 672-680.
