# Supplementary material for: Predicting social media users’ indirect aggression through pre-trained models
Source: PeerJ journal article supplement (doi:10.7717/peerj-cs.2292), 2024-09-02
Supplement: Questionnaire.pdf [file Questionnaire.pdf]

| English version                                                                                                                                                                                                                                                                                                                                                 | Chinese version                                                                                                                                       |
|-----------------------------------------------------------------------------------------------------------------------------------------------------------------------------------------------------------------------------------------------------------------------------------------------------------------------------------------------------------------|-------------------------------------------------------------------------------------------------------------------------------------------------------|
| <p><b>Please answer the questions below according to how you interact with your contacts on Weibo.</b></p> <p>1 = Never behave this way,<br/> 2 = Very rarely behave this way,<br/> 3 = Rarely behave this way,<br/> 4 = Occasionally behave this way,<br/> 5 = Often behave this way,<br/> 6 = Very often behave this way,<br/> 7 = Always behave this way</p> | <p><b>请根据您的您在微博上关注的人的互动情况，回答以下问题。</b></p> <p>1=从没有这种表现<br/> 2=非常少有这种表现<br/> 3=很少有这种表现<br/> 4=偶尔有这种表现<br/> 5=经常有这种表现<br/> 6=频繁有这种表现<br/> 7=一直有这种表现</p> |
| <b>[Social Exclusion]</b>                                                                                                                                                                                                                                                                                                                                       | <b>[社交排斥]</b>                                                                                                                                         |
| Withheld information from one or more people that the rest of the community is let in on                                                                                                                                                                                                                                                                        | 对某些人(或某个人)隐瞒信息，但将这些信息告知其他人                                                                                                                            |
| Purposefully left one or more people out of activities                                                                                                                                                                                                                                                                                                          | 故意将某些人(或某个人)排除在活动之外                                                                                                                                   |
| Made others not talk to one or more people                                                                                                                                                                                                                                                                                                                      | 使其他人不与某些人(或某个人)交谈                                                                                                                                     |
| Excluded one or more people from the community                                                                                                                                                                                                                                                                                                                  | 在集体中排斥某些人(或某个人)                                                                                                                                       |
| Used private in-jokes to exclude one or more people                                                                                                                                                                                                                                                                                                             | 使用私人的内部笑话排挤某些人(或某个人)                                                                                                                                  |
| Spread rumours about one or more people                                                                                                                                                                                                                                                                                                                         | 散布某些人(或某个人)的谣言                                                                                                                                        |
| Made one or more people feel that they don't fit in                                                                                                                                                                                                                                                                                                             | 让某些人(或某个人)感到自己难以融入                                                                                                                                    |
| Stopped talking to one or more people                                                                                                                                                                                                                                                                                                                           | 停止与某些人(或某个人)交谈                                                                                                                                        |
| Omitted one or more people from conversations on purpose                                                                                                                                                                                                                                                                                                        | 在谈话中故意忽略某些人(或某个人)                                                                                                                                     |
| Turned the community against one or more people                                                                                                                                                                                                                                                                                                                 | 让其他人反感某些人(或某个人)                                                                                                                                       |
| <b>[Malicious Humour]</b>                                                                                                                                                                                                                                                                                                                                       | <b>[恶意幽默]</b>                                                                                                                                         |
| Used sarcasm to insult one or more people                                                                                                                                                                                                                                                                                                                       | 用嘲讽的语气侮辱某些人(或某个人)                                                                                                                                     |
| Made negative comments about one or more people's physical appearance                                                                                                                                                                                                                                                                                           | 对某些人(或某个人)的外貌作出负面评价                                                                                                                                   |
| Imitated one or more people in front of others                                                                                                                                                                                                                                                                                                                  | 在众人面前故意模仿某些人(或某个人)                                                                                                                                    |
| Played a nasty practical joke on one or more people                                                                                                                                                                                                                                                                                                             | 对某些人(或某个人)开粗鲁的玩笑                                                                                                                                      |
| Done something to try and make one or more people look stupid                                                                                                                                                                                                                                                                                                   | 做一些事让某些人(或某个人)出丑                                                                                                                                      |
| Intentionally embarrassed one or more people around others                                                                                                                                                                                                                                                                                                      | 在大家面前故意让某些人(或某个人)难堪                                                                                                                                   |
| Made fun of one or more people in public                                                                                                                                                                                                                                                                                                                        | 在公众场合取笑某些人(或某个人)                                                                                                                                      |
| Called one or more people names                                                                                                                                                                                                                                                                                                                                 | 给某些人(或某个人)起负面的外号                                                                                                                                      |
| Criticised one or more people in public                                                                                                                                                                                                                                                                                                                         | 在公众场合批评某些人(或某个人)                                                                                                                                      |
| <b>[Guilt Induction]</b>                                                                                                                                                                                                                                                                                                                                        | <b>[内疚诱导]</b>                                                                                                                                         |
| Used my relationship with one or more people to try and get them to change a decision                                                                                                                                                                                                                                                                           | 利用我与某些人(或某个人)的关系来尝试促使他们改变决定                                                                                                                           |

|                                                                                                  |                               |
|--------------------------------------------------------------------------------------------------|-------------------------------|
| Tried to influence one or more people by making them feel guilty                                 | 试图通过让某些人(或某个人)产生内疚来影响他们       |
| Used one or more people's feelings to coerce them                                                | 利用某些人(或某个人)的感受来强迫他们           |
| Used emotional blackmail on one or more people                                                   | 对某些人(或某个人)使用情感勒索              |
| Pretended to be hurt and/or angry with one or more people to make them feel bad about themselves | 假装被某些人(或某个人)伤害和/或生气，使其为自己感到难过 |
| Put undue pressure on one or more people                                                         | 对某些人(或某个人)施加过分的压力             |
